# Supplementary material
Source: publisher site journal article supplement (https://www.jstage.jst.go.jp/article/geochemj/48/3/48_2.0307/_supplement/_download/48_2.0307_1.pdf)
Supplement: Supplementary file 1 [file 48_2.0307_1.pdf]

*Supplementary Table S1. Operation parameters for fsLA-MIC-ICPMS*

---

|                          |                                                                                                   |
|--------------------------|---------------------------------------------------------------------------------------------------|
| Laser ablation           |                                                                                                   |
| Type of laser            | femto-second                                                                                      |
| Pulse width              | <300 fs                                                                                           |
| Wavelength               | 200 nm                                                                                            |
| Laser fluence            | 6 J cm <sup>-2</sup>                                                                              |
| Ablation mode            | Rotation raster                                                                                   |
| Spot size                | 30 μm                                                                                             |
| Repetition rate          | 1-10 Hz                                                                                           |
| Ablation cell            | ~20 cm <sup>3</sup> (in-house made)                                                               |
| Aerosol carrier gas (He) | 1.2 L min <sup>-1</sup>                                                                           |
| Mass spectrometer        |                                                                                                   |
| MC-ICPMS                 | Thermo Fisher Scientific, Neptune (modified)                                                      |
| RF power                 | 1200 W (27.12 MHz)                                                                                |
| Guard electrode          | On                                                                                                |
| Plasma gas (Ar)          | 15 L min <sup>-1</sup>                                                                            |
| Auxiliary gas (Ar)       | 1 L min <sup>-1</sup>                                                                             |
| Make-up gas (Ar)         | 1 – 1.3 L min <sup>-1</sup><br>(mixed with carrier He in 150 ml chamber)                          |
| Sample cone              | JET-cone (Ni), Normal (N)-cone (Ni) was also used for comparison                                  |
| Skimmer cone             | X-cone (Ni)                                                                                       |
| Mass resolution          | 400 (low resolution)                                                                              |
| Collector assignment     | IC array<br>Center mass: 221.2<br>IC1: 204(Pb+Hg)<br>IC2: 206(Pb)<br>IC3: 207(Pb)<br>IC4: 208(Pb) |

---

Supplementary Table S2. Pb isotope ratios of BHVO-2G (Pb 1.7 ppm) measured by 200-nm fsLA-MIC-ICP-MS using 30- $\mu$ m crater and 10 Hz laser repetition rate

| Sample     | Measurement data | Bracketing standard | ICP interface | Isotope ratio                     |                                   | Meas. error (2 SE*)               |                                   |
|------------|------------------|---------------------|---------------|-----------------------------------|-----------------------------------|-----------------------------------|-----------------------------------|
|            |                  |                     |               | $^{207}\text{Pb}/^{206}\text{Pb}$ | $^{208}\text{Pb}/^{206}\text{Pb}$ | $^{207}\text{Pb}/^{206}\text{Pb}$ | $^{208}\text{Pb}/^{206}\text{Pb}$ |
| BHVO-2G_1  | Dec. 14, 2011    | BCR-2G              | N-X           | 0.836                             | 2.067                             | 0.008                             | 0.015                             |
| BHVO-2G_2  |                  | BCR-2G              | N-X           | 0.841                             | 2.057                             | 0.008                             | 0.016                             |
| BHVO-2G_3  |                  | BCR-2G              | N-X           | 0.831                             | 2.049                             | 0.008                             | 0.016                             |
| BHVO-2G_4  |                  | BCR-2G              | N-X           | 0.837                             | 2.052                             | 0.008                             | 0.016                             |
| BHVO-2G_5  |                  | BCR-2G              | N-X           | 0.831                             | 2.044                             | 0.008                             | 0.015                             |
| BHVO-2G_3  | Apr. 26, 2012    | GSD-1G              | N-X           | 0.827                             | 2.057                             | 0.012                             | 0.022                             |
| BHVO-2G_4  |                  | GSD-1G              | N-X           | 0.829                             | 2.047                             | 0.011                             | 0.022                             |
| BHVO-2G_5  |                  | GSD-1G              | N-X           | 0.823                             | 2.048                             | 0.011                             | 0.021                             |
| BHVO-2G_1  | Apr. 27, 2012    | BCR-2G              | N-X           | 0.833                             | 2.060                             | 0.006                             | 0.012                             |
| BHVO-2G_2  |                  | BCR-2G              | N-X           | 0.832                             | 2.047                             | 0.006                             | 0.013                             |
| BHVO-2G_3  |                  | BCR-2G              | N-X           | 0.834                             | 2.058                             | 0.006                             | 0.013                             |
| BHVO-2G_4  |                  | BCR-2G              | N-X           | 0.830                             | 2.050                             | 0.007                             | 0.013                             |
| BHVO-2G_5  |                  | BCR-2G              | N-X           | 0.835                             | 2.057                             | 0.006                             | 0.012                             |
| BHVO-2G_1  | Apr. 27, 2012    | BCR-2G              | N-X           | 0.824                             | 2.047                             | 0.007                             | 0.014                             |
| BHVO-2G_2  |                  | BCR-2G              | N-X           | 0.826                             | 2.059                             | 0.007                             | 0.014                             |
| BHVO-2G_3  |                  | BCR-2G              | N-X           | 0.830                             | 2.038                             | 0.007                             | 0.014                             |
| BHVO-2G_4  |                  | BCR-2G              | N-X           | 0.830                             | 2.056                             | 0.007                             | 0.013                             |
| BHVO-2G_5  |                  | BCR-2G              | N-X           | 0.827                             | 2.038                             | 0.007                             | 0.013                             |
| BHVO-2G_1  | May. 2, 2012     | BCR-2G              | N-X           | 0.831                             | 2.044                             | 0.006                             | 0.012                             |
| BHVO-2G_2  |                  | BCR-2G              | N-X           | 0.836                             | 2.058                             | 0.006                             | 0.013                             |
| BHVO-2G_3  |                  | BCR-2G              | N-X           | 0.832                             | 2.050                             | 0.006                             | 0.012                             |
| BHVO-2G_4  |                  | BCR-2G              | N-X           | 0.836                             | 2.060                             | 0.006                             | 0.012                             |
| BHVO-2G_5  |                  | BCR-2G              | N-X           | 0.830                             | 2.051                             | 0.006                             | 0.014                             |
| BHVO-2G_1  | May. 7, 2012     | BCR-2G              | Jet-X         | 0.835                             | 2.056                             | 0.005                             | 0.009                             |
| BHVO-2G_2  |                  | BCR-2G              | Jet-X         | 0.833                             | 2.053                             | 0.004                             | 0.009                             |
| BHVO-2G_3  |                  | BCR-2G              | Jet-X         | 0.833                             | 2.057                             | 0.005                             | 0.010                             |
| BHVO-2G_4  |                  | BCR-2G              | Jet-X         | 0.839                             | 2.059                             | 0.005                             | 0.010                             |
| BHVO-2G_5  |                  | BCR-2G              | Jet-X         | 0.834                             | 2.056                             | 0.005                             | 0.010                             |
| BHVO-2G_1  | May. 9, 2012     | BCR-2G              | Jet-X         | 0.836                             | 2.052                             | 0.006                             | 0.011                             |
| BHVO-2G_2  |                  | BCR-2G              | Jet-X         | 0.836                             | 2.051                             | 0.005                             | 0.012                             |
| BHVO-2G_3  |                  | BCR-2G              | Jet-X         | 0.836                             | 2.048                             | 0.006                             | 0.010                             |
| BHVO-2G_4  |                  | BCR-2G              | Jet-X         | 0.835                             | 2.048                             | 0.006                             | 0.011                             |
| BHVO-2G_5  |                  | BCR-2G              | Jet-X         | 0.835                             | 2.050                             | 0.005                             | 0.011                             |
| BHVO-2G_1  | May. 16, 2012    | BCR-2G              | Jet-X         | 0.839                             | 2.043                             | 0.007                             | 0.014                             |
| BHVO-2G_2  |                  | BCR-2G              | Jet-X         | 0.837                             | 2.054                             | 0.007                             | 0.013                             |
| BHVO-2G_3  |                  | BCR-2G              | Jet-X         | 0.840                             | 2.060                             | 0.007                             | 0.014                             |
| BHVO-2G_4  |                  | BCR-2G              | Jet-X         | 0.840                             | 2.066                             | 0.007                             | 0.015                             |
| BHVO-2G_3  | Jun. 26, 2012    | BCR-2G              | Jet-X         | 0.833                             | 2.061                             | 0.005                             | 0.012                             |
| BHVO-2G_5  |                  | BCR-2G              | Jet-X         | 0.834                             | 2.058                             | 0.005                             | 0.011                             |
| BHVO-2G_7  |                  | BCR-2G              | Jet-X         | 0.832                             | 2.022                             | 0.005                             | 0.011                             |
| BHVO-2G_8  |                  | BCR-2G              | Jet-X         | 0.831                             | 2.045                             | 0.005                             | 0.012                             |
| BHVO-2G_10 |                  | BCR-2G              | Jet-X         | 0.829                             | 2.039                             | 0.005                             | 0.011                             |
| BHVO-2G_1  | Jun. 26, 2012    | NIST 612            | Jet-X         | 0.835                             | 2.026                             | 0.005                             | 0.010                             |
| BHVO-2G_4  |                  | NIST 612            | Jet-X         | 0.831                             | 2.052                             | 0.005                             | 0.010                             |
| BHVO-2G_1  | Jul. 2, 2012     | NIST 612            | Jet-X         | 0.838                             | 2.045                             | 0.007                             | 0.016                             |
| BHVO-2G_4  |                  | NIST 612            | Jet-X         | 0.831                             | 2.042                             | 0.007                             | 0.015                             |
| BHVO-2G_6  |                  | NIST 612            | Jet-X         | 0.841                             | 2.045                             | 0.007                             | 0.015                             |
| BHVO-2G_1  | Jan. 15, 2013    | BCR-2G              | Jet-X         | 0.834                             | 2.054                             | 0.005                             | 0.009                             |
| BHVO-2G_2  |                  | BCR-2G              | Jet-X         | 0.836                             | 2.059                             | 0.005                             | 0.009                             |
| BHVO-2G_3  |                  | BCR-2G              | Jet-X         | 0.839                             | 2.053                             | 0.005                             | 0.010                             |

|                              |               |          |       |               |               |       |       |
|------------------------------|---------------|----------|-------|---------------|---------------|-------|-------|
| BHVO-2G_4                    |               | BCR-2G   | Jet-X | 0.837         | 2.053         | 0.004 | 0.010 |
| BHVO-2G_5                    |               | BCR-2G   | Jet-X | 0.834         | 2.046         | 0.005 | 0.010 |
| BHVO-2G_1                    | Jan. 15, 2013 | NIST 612 | Jet-X | 0.838         | 2.064         | 0.005 | 0.009 |
| BHVO-2G_2                    |               | NIST 612 | Jet-X | 0.831         | 2.061         | 0.004 | 0.009 |
| BHVO-2G_3                    |               | NIST 612 | Jet-X | 0.834         | 2.065         | 0.005 | 0.009 |
| BHVO-2G_4                    |               | NIST 612 | Jet-X | 0.838         | 2.062         | 0.004 | 0.009 |
| BHVO-2G_5                    |               | NIST 612 | Jet-X | 0.830         | 2.051         | 0.004 | 0.009 |
| BHVO-2G_1                    | Feb. 22, 2013 | NIST 612 | Jet-X | 0.834         | 2.065         | 0.004 | 0.009 |
| BHVO-2G_2                    |               | NIST 612 | Jet-X | 0.839         | 2.066         | 0.004 | 0.008 |
| BHVO-2G_3                    |               | NIST 612 | Jet-X | 0.834         | 2.064         | 0.004 | 0.008 |
| BHVO-2G_4                    |               | NIST 612 | Jet-X | 0.834         | 2.066         | 0.004 | 0.008 |
| Mean (n = 61)                |               |          |       | 0.834         | 2.053         |       |       |
| 2 SD                         |               |          |       | 0.008         | 0.018         |       |       |
| 2 SD, %                      |               |          |       | 0.96          | 0.89          |       |       |
| Accuracy**, %                |               |          |       | 0.19 (0.07)   | 0.24 (0.13)   |       |       |
| Ref. value <sup>a</sup>      |               |          |       | 0.832 ± 0.001 | 2.048 ± 0.003 |       |       |
| LA-ICP-MS value <sup>b</sup> |               |          |       | 0.833 ± 0.002 | 2.050 ± 0.002 |       |       |

\*Bracketing standards error propagated.

\*\*Compared with solution MC-ICP-MS data (Elburg et al., 2005), and LA-SF-ICP-MS data in brackets (Jochum et al., 2005c).

<sup>a</sup> Reference values taken from Elburg et al. (2005), errors are +/- 2SD.

<sup>b</sup> Reference values taken from Jochum et al. (2005c), errors are +/- 1SE.

Supplementary Table S3. Pb isotope ratio analyses of geological reference glasses from MPI-DING and USGS measured by 200-nm fsLA-MIC-ICP-MS

| Sample                                      | Bracketing ICP |           | Laser repetition | Isotope ratio                     |                                   | 2SE                               |                                   |
|---------------------------------------------|----------------|-----------|------------------|-----------------------------------|-----------------------------------|-----------------------------------|-----------------------------------|
|                                             | standard       | interface |                  | $^{207}\text{Pb}/^{206}\text{Pb}$ | $^{208}\text{Pb}/^{206}\text{Pb}$ | $^{207}\text{Pb}/^{206}\text{Pb}$ | $^{208}\text{Pb}/^{206}\text{Pb}$ |
| KL2-G (MPI-DING basalt, Pb 2.07 ppm)        |                |           |                  |                                   |                                   |                                   |                                   |
| KL2-G_1                                     | BCR-2G         | JET-X     | 10 Hz            | 0.833                             | 2.045                             | 0.004                             | 0.009                             |
| KL2-G_2                                     | BCR-2G         | JET-X     | 10 Hz            | 0.832                             | 2.048                             | 0.004                             | 0.008                             |
| KL2-G_3                                     | BCR-2G         | JET-X     | 10 Hz            | 0.828                             | 2.038                             | 0.004                             | 0.008                             |
| KL2-G_4                                     | BCR-2G         | JET-X     | 10 Hz            | 0.831                             | 2.046                             | 0.005                             | 0.008                             |
| KL2-G_5                                     | BCR-2G         | JET-X     | 10 Hz            | 0.829                             | 2.042                             | 0.005                             | 0.008                             |
| KL2-G_1                                     | BCR-2G         | JET-X     | 10 Hz            | 0.831                             | 2.049                             | 0.005                             | 0.010                             |
| KL2-G_2                                     | BCR-2G         | JET-X     | 10 Hz            | 0.839                             | 2.057                             | 0.005                             | 0.010                             |
| KL2-G_3                                     | BCR-2G         | JET-X     | 10 Hz            | 0.835                             | 2.036                             | 0.005                             | 0.010                             |
| KL2-G_4                                     | BCR-2G         | JET-X     | 10 Hz            | 0.830                             | 2.037                             | 0.005                             | 0.010                             |
| KL2-G_5                                     | BCR-2G         | JET-X     | 10 Hz            | 0.829                             | 2.039                             | 0.005                             | 0.011                             |
| KL2-G_1                                     | NIST612        | JET-X     | 10 Hz            | 0.825                             | 2.036                             | 0.005                             | 0.011                             |
| KL2-G_2                                     | NIST612        | JET-X     | 10 Hz            | 0.818                             | 2.025                             | 0.005                             | 0.011                             |
| KL2-G_3                                     | NIST612        | JET-X     | 10 Hz            | 0.826                             | 2.028                             | 0.005                             | 0.011                             |
| KL2-G_4                                     | NIST612        | JET-X     | 10 Hz            | 0.819                             | 2.021                             | 0.005                             | 0.010                             |
| KL2-G_5                                     | NIST612        | JET-X     | 10 Hz            | 0.826                             | 2.023                             | 0.005                             | 0.011                             |
| Mean                                        |                |           |                  | <b>0.829</b>                      | <b>2.038</b>                      |                                   |                                   |
| 2 SD                                        |                |           |                  | 0.011                             | 0.021                             |                                   |                                   |
| 2 SD, %                                     |                |           |                  | 1.34                              | 1.02                              |                                   |                                   |
| Accuracy, %                                 |                |           |                  | 0.95                              | 0.73                              |                                   |                                   |
| Reference value (a)                         |                |           |                  | 0.821                             | 2.023                             |                                   |                                   |
| (b)                                         |                |           |                  | 0.821                             | 2.024                             |                                   |                                   |
| StHs6/80-G (MPI-DING andesite, Pb 10.3 ppm) |                |           |                  |                                   |                                   |                                   |                                   |
| StHs6/80-G_1                                | NIST612        | JET-X     | 5 Hz             | 0.834                             | 2.050                             | 0.004                             | 0.008                             |
| StHs6/80-G_2                                | NIST612        | JET-X     | 5 Hz             | 0.826                             | 2.043                             | 0.004                             | 0.007                             |
| StHs6/80-G_3                                | NIST612        | JET-X     | 5 Hz             | 0.823                             | 2.037                             | 0.003                             | 0.008                             |
| StHs6/80-G_4                                | NIST612        | JET-X     | 5 Hz             | 0.825                             | 2.048                             | 0.004                             | 0.008                             |
| StHs6/80-G_5                                | NIST612        | JET-X     | 5 Hz             | 0.829                             | 2.047                             | 0.004                             | 0.008                             |
| Mean                                        |                |           |                  | <b>0.828</b>                      | <b>2.045</b>                      |                                   |                                   |
| 2 SD                                        |                |           |                  | 0.009                             | 0.010                             |                                   |                                   |
| 2 SD, %                                     |                |           |                  | 1.05                              | 0.51                              |                                   |                                   |
| Accuracy, %                                 |                |           |                  | 0.15                              | 0.34                              |                                   |                                   |
| Reference value (a)                         |                |           |                  | 0.826                             | 2.038                             |                                   |                                   |
| (b)                                         |                |           |                  | 0.826                             | 2.038                             |                                   |                                   |
| ATHO-G (MPI-DING rhyolite, Pb 5.67 ppm)     |                |           |                  |                                   |                                   |                                   |                                   |
| ATHO-G_1                                    | BCR-2G         | JET-X     | 10 Hz            | 0.845                             | 2.080                             | 0.003                             | 0.006                             |
| ATHO-G_2                                    | BCR-2G         | JET-X     | 10 Hz            | 0.847                             | 2.080                             | 0.003                             | 0.006                             |
| ATHO-G_3                                    | BCR-2G         | JET-X     | 10 Hz            | 0.845                             | 2.074                             | 0.003                             | 0.006                             |
| ATHO-G_4                                    | BCR-2G         | JET-X     | 10 Hz            | 0.845                             | 2.076                             | 0.003                             | 0.006                             |
| ATHO-G_5                                    | BCR-2G         | JET-X     | 10 Hz            | 0.844                             | 2.076                             | 0.003                             | 0.006                             |
| ATHO-G_1                                    | BCR-2G         | JET-X     | 10 Hz            | 0.847                             | 2.085                             | 0.003                             | 0.006                             |
| ATHO-G_2                                    | BCR-2G         | JET-X     | 10 Hz            | 0.847                             | 2.075                             | 0.003                             | 0.006                             |
| ATHO-G_3                                    | BCR-2G         | JET-X     | 10 Hz            | 0.847                             | 2.076                             | 0.003                             | 0.007                             |
| ATHO-G_4                                    | BCR-2G         | JET-X     | 10 Hz            | 0.843                             | 2.078                             | 0.003                             | 0.006                             |
| ATHO-G_5                                    | BCR-2G         | JET-X     | 10 Hz            | 0.843                             | 2.074                             | 0.003                             | 0.006                             |
| ATHO-G_1                                    | NIST612        | JET-X     | 10 Hz            | 0.838                             | 2.071                             | 0.003                             | 0.008                             |
| ATHO-G_2                                    | NIST612        | JET-X     | 5 Hz             | 0.843                             | 2.076                             | 0.004                             | 0.009                             |

|                     |         |       |      |              |              |       |       |
|---------------------|---------|-------|------|--------------|--------------|-------|-------|
| ATHO-G_3            | NIST612 | JET-X | 5 Hz | 0.851        | 2.084        | 0.004 | 0.009 |
| ATHO-G_4            | NIST612 | JET-X | 5 Hz | 0.848        | 2.082        | 0.004 | 0.009 |
| ATHO-G_5            | NIST612 | JET-X | 5 Hz | 0.842        | 2.076        | 0.004 | 0.010 |
| Mean                |         |       |      | <b>0.845</b> | <b>2.078</b> |       |       |
| 2 SD                |         |       |      | 0.006        | 0.008        |       |       |
| 2 SD, %             |         |       |      | 0.71         | 0.39         |       |       |
| Accuracy, %         |         |       |      | 0.34         | 0.17         |       |       |
| Reference value (a) |         |       |      | 0.842        | 2.074        |       |       |
| (b)                 |         |       |      | 0.842        | 2.073        |       |       |
| (c)                 |         |       |      | 0.842        | 2.075        |       |       |
| (d)                 |         |       |      | 0.841        | 2.076        |       |       |

T1-G (MPI-DING quartz-diorite, Pb 11.6 ppm)

|                     |         |       |      |              |              |       |       |
|---------------------|---------|-------|------|--------------|--------------|-------|-------|
| T1-G_1              | NIST612 | JET-X | 3 Hz | 0.836        | 2.081        | 0.004 | 0.009 |
| T1-G_2              | NIST612 | JET-X | 3 Hz | 0.840        | 2.075        | 0.004 | 0.009 |
| T1-G_3              | NIST612 | JET-X | 3 Hz | 0.835        | 2.090        | 0.004 | 0.008 |
| T1-G_4              | NIST612 | JET-X | 3 Hz | 0.835        | 2.078        | 0.004 | 0.009 |
| T1-G_5              | NIST612 | JET-X | 3 Hz | 0.833        | 2.073        | 0.004 | 0.009 |
| T1-G_1              | NIST612 | JET-X | 5 Hz | 0.834        | 2.075        | 0.004 | 0.008 |
| T1-G_2              | NIST612 | JET-X | 5 Hz | 0.838        | 2.059        | 0.004 | 0.008 |
| T1-G_3              | NIST612 | JET-X | 5 Hz | 0.838        | 2.086        | 0.004 | 0.009 |
| T1-G_5              | NIST612 | JET-X | 5 Hz | 0.832        | 2.085        | 0.004 | 0.009 |
| T1-G_6              | NIST612 | JET-X | 5 Hz | 0.837        | 2.066        | 0.003 | 0.008 |
| Mean                |         |       |      | <b>0.836</b> | <b>2.077</b> |       |       |
| 2 SD                |         |       |      | 0.005        | 0.019        |       |       |
| 2 SD, %             |         |       |      | 0.55         | 0.91         |       |       |
| Accuracy, %         |         |       |      | -0.19        | -0.20        |       |       |
| Reference value (a) |         |       |      | 0.837        | 2.081        |       |       |
| (b)                 |         |       |      | 0.837        | 2.081        |       |       |

GOR132-G (MPI-DING komatiite, Pb 19.5 ppm)

|                     |         |       |      |              |              |       |       |
|---------------------|---------|-------|------|--------------|--------------|-------|-------|
| GOR132-G_1          | BCR-2G  | JET-X | 5 Hz | 0.821        | 2.008        | 0.003 | 0.005 |
| GOR132-G_2          | BCR-2G  | JET-X | 5 Hz | 0.818        | 2.007        | 0.003 | 0.005 |
| GOR132-G_3          | BCR-2G  | JET-X | 5 Hz | 0.817        | 2.008        | 0.002 | 0.005 |
| GOR132-G_4          | BCR-2G  | JET-X | 5 Hz | 0.817        | 2.010        | 0.003 | 0.005 |
| GOR132-G_5          | BCR-2G  | JET-X | 5 Hz | 0.817        | 2.010        | 0.002 | 0.005 |
| GOR132-G_1          | BCR-2G  | JET-X | 5 Hz | 0.827        | 2.034        | 0.003 | 0.005 |
| GOR132-G_2          | BCR-2G  | JET-X | 5 Hz | 0.819        | 2.016        | 0.003 | 0.005 |
| GOR132-G_3          | BCR-2G  | JET-X | 5 Hz | 0.814        | 2.006        | 0.003 | 0.005 |
| GOR132-G_4          | BCR-2G  | JET-X | 5 Hz | 0.816        | 2.012        | 0.003 | 0.005 |
| GOR132-G_5          | BCR-2G  | JET-X | 5 Hz | 0.816        | 2.008        | 0.003 | 0.006 |
| GOR132-G_1          | NIST612 | JET-X | 2 Hz | 0.820        | 2.011        | 0.004 | 0.009 |
| GOR132-G_2          | NIST612 | JET-X | 2 Hz | 0.820        | 2.015        | 0.004 | 0.008 |
| GOR132-G_3          | NIST612 | JET-X | 2 Hz | 0.822        | 2.025        | 0.004 | 0.009 |
| GOR132-G_4          | NIST612 | JET-X | 2 Hz | 0.819        | 2.020        | 0.004 | 0.008 |
| GOR132-G_5          | NIST612 | JET-X | 2 Hz | 0.819        | 2.017        | 0.004 | 0.008 |
| Mean                |         |       |      | <b>0.819</b> | <b>2.014</b> |       |       |
| 2 SD                |         |       |      | 0.006        | 0.015        |       |       |
| 2 SD, %             |         |       |      | 0.74         | 0.76         |       |       |
| Accuracy, %         |         |       |      | 0.36         | 0.29         |       |       |
| Reference value (a) |         |       |      | 0.816        | 2.008        |       |       |
| (b)                 |         |       |      | 0.817        | 2.011        |       |       |

GSD-1G (USGS doped basalt glass, Pb 48 ppm)

|                     |         |       |      |              |              |       |       |
|---------------------|---------|-------|------|--------------|--------------|-------|-------|
| GSD-1G_3            | BCR-2G  | N-X   | 1 Hz | 0.804        | 1.972        | 0.003 | 0.006 |
| GSD-1G_4            | BCR-2G  | N-X   | 1 Hz | 0.806        | 1.972        | 0.003 | 0.006 |
| GSD-1G_5            | BCR-2G  | N-X   | 1 Hz | 0.803        | 1.975        | 0.003 | 0.006 |
| GSD-1G_6            | BCR-2G  | N-X   | 1 Hz | 0.800        | 1.972        | 0.003 | 0.006 |
| GSD-1G_7            | BCR-2G  | N-X   | 1 Hz | 0.806        | 1.985        | 0.003 | 0.006 |
| GSD-1G_1            | NIST612 | JET-X | 1 Hz | 0.807        | 1.991        | 0.003 | 0.007 |
| GSD-1G_2            | NIST612 | JET-X | 1 Hz | 0.805        | 1.975        | 0.003 | 0.007 |
| GSD-1G_3            | NIST612 | JET-X | 1 Hz | 0.810        | 1.988        | 0.003 | 0.007 |
| GSD-1G_4            | NIST612 | JET-X | 1 Hz | 0.805        | 1.984        | 0.003 | 0.007 |
| GSD-1G_5            | NIST612 | JET-X | 1 Hz | 0.801        | 1.983        | 0.003 | 0.007 |
| Mean                |         |       |      | <b>0.805</b> | <b>1.980</b> |       |       |
| 2 SD                |         |       |      | 0.006        | 0.015        |       |       |
| 2 SD, %             |         |       |      | 0.74         | 0.73         |       |       |
| Accuracy, %         |         |       |      | 0.07         | -0.38        |       |       |
| Reference value (a) |         |       |      | 0.804        | 1.987        |       |       |

---

Note: 2SE with each analysis is bracketing standards propagated in-run error. Pb concentration data are from Jochum et al. (2006) for MPI-DING glasses; Guillong et al. (2005) for GSD-1G; GeoReM (<http://georem.mpch-mainz.gwdg.de>), Application Ver. 15, 2013) for BHVO-2G. Accuracy compared with preferred values of calculated (Jochum et al., 2011). Reference values of Pb isotopes are (a) Jochum et al. (2011); (b) Jochum et al. (2005b); (c) Paul et al. (2011); (d) Souders and Sylvester (2007).
